# Supplementary material for: Development and Validation of a New Tool to Assess Burden of Dietary Sodium Restriction in Patients with Chronic Heart Failure: The BIRD Questionnaire
Source: MDPI journal article supplement (doi:10.3390/nu10101453), 2018-10-07
Supplement: s1 [file s1]

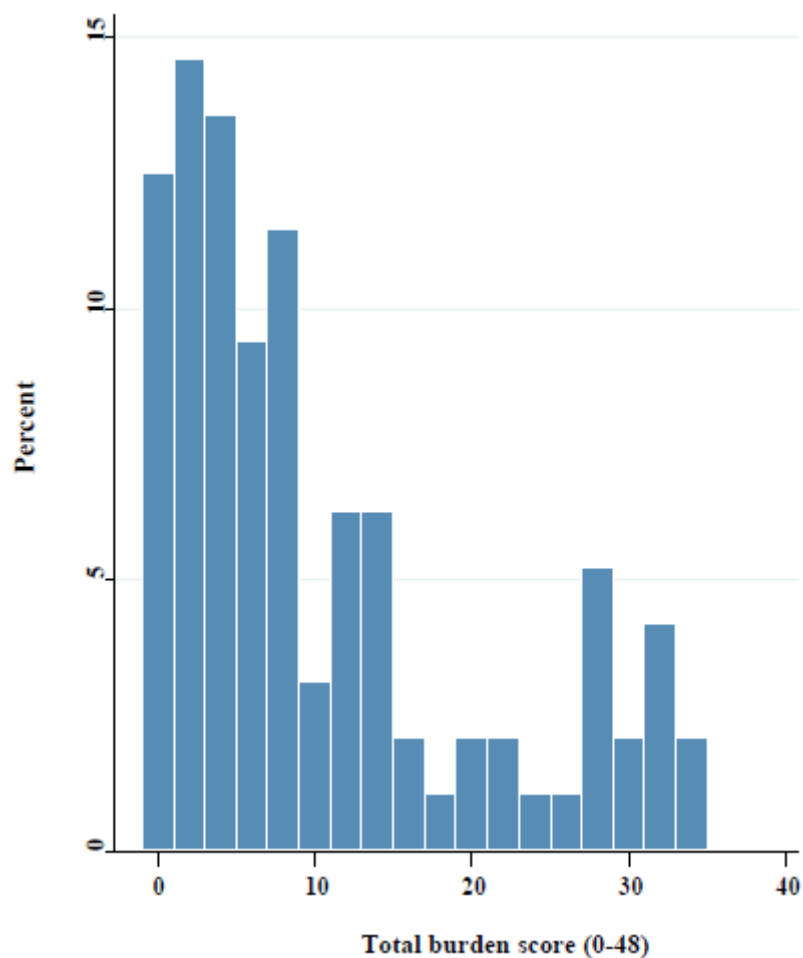

**Figure S1.** Global 12-item BIRD score distribution in the validation study population (N=96).

**Table S1.** Steps for the linguistic and cross-cultural adaptation.

| Step | Details                                                       |                                                                                                                                      |
|------|---------------------------------------------------------------|--------------------------------------------------------------------------------------------------------------------------------------|
| 1    | Preparation                                                   | Evaluation of the source text from a linguistic and cultural point of view including definition of concepts                          |
| 2    | Forward translations                                          | Forward translation into English by two independent translators                                                                      |
| 3    | Reconciliation                                                | Comparison of the two forward translations to provide the best adaptation and produce a draft version of the text                    |
| 4    | Back translation                                              | Translation of the draft forward translation back into English without reference to the original language                            |
| 5    | Back-translation review                                       | Comparison of the original text and the back translation to verify that the meaning of the draft translation is equivalent to source |
| 6    | Analysis and implementation of back-translation review report | Analysis of the back-translation review report to verify if there are changes required to the draft forward                          |
| 7    | Pilot testing                                                 | Clinical review and cognitive debriefing                                                                                             |

|   |                                                           |                                                                                                                                        |
|---|-----------------------------------------------------------|----------------------------------------------------------------------------------------------------------------------------------------|
| 8 | Review of cognitive debriefing or clinical review results | Review of the results from the cognitive debriefing or clinical review to identify translation modifications necessary for improvement |
| 9 | Proofreading and finalization                             | Last stage, which aims to a cross-cultural and validated translation of the questionnaire                                              |

**Table S2.** General characteristics of the study population (N=96).

| Variable                                     |                             | N (%)                 |
|----------------------------------------------|-----------------------------|-----------------------|
| <b>Gender, women</b>                         |                             | 27 (28.1)             |
| <b>Age, years</b>                            | Mean $\pm$ SD               | 62.4 $\pm$ 12.3       |
|                                              | <55 years                   | 26 (27.1)             |
|                                              | 55-70 years                 | 42 (43.8)             |
|                                              | >70 years                   | 28 (29.2)             |
| <b>Hypertension (%)</b>                      |                             | 43 (49.4%)            |
| <b>Diabetes (%)</b>                          |                             | 24 (27.6%)            |
| <b>Obesity (%)</b>                           |                             | 19 (21.8%)            |
| <b>Body Mass Index, kg/m<sup>2</sup></b>     | Mean $\pm$ SD               | 26.5 $\pm$ 5.4        |
| <b>NYHA classification</b>                   | I                           | 14 (17.5)             |
|                                              | II                          | 29 (36.3)             |
|                                              | III                         | 26 (32.5)             |
|                                              | IV                          | 11 (13.8)             |
| <b>Left ventricular ejection fraction, %</b> | Median (IQR)                | 31.5 (25.0;45.0)      |
| <b>NT-proBNP, pg/ml</b>                      | Median (IQR)                | 1480.0 (452.0;3290.0) |
| <b>Serum creatinine, umol/L</b>              | Median (IQR)                | 97.0 (77.0;130.0)     |
| <b>Prescribed low sodium diet</b>            | Normal >6 g                 | 7 (8.0)               |
|                                              | Moderately restricted 3-6 g | 57 (65.5)             |
|                                              | Highly restricted <3 g      | 23 (26.4)             |
| <b>Minnesota Living with Heart Failure</b>   |                             |                       |
| <b>Total score (0-105)</b>                   | Mean $\pm$ SD               | 36.8 $\pm$ 26.0       |
| <b>Physical domain (0-40)</b>                | Mean $\pm$ SD               | 16.1 $\pm$ 11.6       |
| <b>Emotional domain (0-25)</b>               | Mean $\pm$ SD               | 8.0 $\pm$ 6.9         |
| <b>Other items (0-40)</b>                    | Mean $\pm$ SD               | 12.7 $\pm$ 9.7        |

Results are N (%) unless otherwise stated. SD: Standard deviation; NYHA: New York Heart Association; IQR: Interquartile range.

**Table S3.** One-factor solution of the BIRD questionnaire: results for the initial 14-items and after deletion of items 1 and 2.

| Item | 14-items        |                    | 12-items        |                    |
|------|-----------------|--------------------|-----------------|--------------------|
|      | Factor loadings | Communality values | Factor loadings | Communality values |
| 1    | 0.37            | 0.14               | -               | -                  |
| 2    | 0.42            | 0.17               | -               | -                  |
| 3    | 0.66            | 0.44               | 0.62            | 0.39               |
| 4    | 0.59            | 0.35               | 0.58            | 0.34               |
| 5    | 0.66            | 0.43               | 0.67            | 0.45               |
| 6    | 0.67            | 0.45               | 0.66            | 0.44               |
| 7    | 0.71            | 0.51               | 0.71            | 0.50               |
| 8    | 0.75            | 0.56               | 0.75            | 0.57               |
| 9    | 0.74            | 0.55               | 0.75            | 0.57               |
| 10   | 0.63            | 0.40               | 0.63            | 0.40               |
| 11   | 0.72            | 0.52               | 0.72            | 0.51               |
| 12   | 0.58            | 0.34               | 0.59            | 0.35               |
| 13   | 0.76            | 0.58               | 0.76            | 0.58               |
| 14   | 0.70            | 0.50               | 0.72            | 0.52               |
